# Supplementary material
Source: PubMed Central journal article supplement (PMC4248653)
Supplement: 78.4.672_zmr999092377so1.pdf [file 78.4.672_zmr999092377so1.pdf]

**Supplementary Table 1**

| Phylum                | Class               | Species                                                    | Protein                                           | MCP type |
|-----------------------|---------------------|------------------------------------------------------------|---------------------------------------------------|----------|
| <b>Actinobacteria</b> | Actinobacteria      | <i>Kineococcus radiotolerans</i> SRS30216                  | <a href="#">A6W942_KINRD</a>                      | IVb      |
| <b>Firmicutes</b>     | Clostridia          | <i>Caldicellulosiruptor bescii</i> DSM 6725                | <a href="#">B9MML0_ANATD</a>                      | IVb      |
| <b>Firmicutes</b>     | Clostridia          | <i>Caldicellulosiruptor bescii</i> DSM 6725                | <a href="#">B9MPD9_ANATD</a>                      | IVb      |
| <b>Firmicutes</b>     | Clostridia          | <i>Caldicellulosiruptor saccharolyticus</i> DSM 8903       | <a href="#">A4XHP4_CALS8</a>                      | IVb      |
| <b>Firmicutes</b>     | Clostridia          | <i>Carboxydotherrnus hydrogenoformans</i> Z-2901           | <a href="#">Q3ADA8_CARHZ</a>                      | IVb      |
| <b>Firmicutes</b>     | Clostridia          | <i>Syntrophomonas wolfei</i> subsp. wolfei str. Goettingen | <a href="#">Q0AWZ6_SYNW</a><br><a href="#">W</a>  | IVb      |
| <b>Firmicutes</b>     | Clostridia          | <i>Thermoanaerobacter tengcongensis</i> MB4                | <a href="#">273068.TTE1033</a>                    | IVb      |
| <b>Proteobacteria</b> | Alphaproteobacteria | <i>Caulobacter</i> sp. K31                                 | <a href="#">B0T3W8_CAUSK</a>                      | IVb      |
| <b>Proteobacteria</b> | Alphaproteobacteria | <i>Methylobacterium nodulans</i> ORS 2060                  | <a href="#">B8IF81_METNO</a>                      | IVb      |
| <b>Proteobacteria</b> | Alphaproteobacteria | <i>Methylobacterium</i> sp. 4-46                           | <a href="#">B0UBC2_METS4</a>                      | IVb      |
| <b>Proteobacteria</b> | Alphaproteobacteria | <i>Rhodopseudomonas palustris</i> BisA53                   | <a href="#">Q07KG7_RHOP5</a>                      | IVa      |
| <b>Proteobacteria</b> | Alphaproteobacteria | <i>Rhodopseudomonas palustris</i> BisB18                   | <a href="#">Q20XK1_RHOPB</a>                      | IVa      |
| <b>Proteobacteria</b> | Alphaproteobacteria | <i>Rhodospirillum centenum</i> SW                          | <a href="#">B6IQQ4_RHOCS</a>                      | IVb      |
| <b>Proteobacteria</b> | Alphaproteobacteria | <i>Rhodospirillum rubrum</i> ATCC 11170                    | <a href="#">Q2RRX4_RHORT</a>                      | IVb      |
| <b>Proteobacteria</b> | Betaproteobacteria  | <i>Burkholderia glumae</i> BGR1                            | <a href="#">C5AK88_BURGB</a>                      | IVb      |
| <b>Proteobacteria</b> | Gammaproteobacteria | <i>Alteromonas macleodii</i> 'Deep ecotype'                | <a href="#">B4RWW9_ALTMD</a><br><a href="#">D</a> | IVb      |
| <b>Proteobacteria</b> | Gammaproteobacteria | <i>Vibrio cholerae</i> M66-2                               | <a href="#">C3LM98_VIBCM</a>                      | IVb      |
| <b>Proteobacteria</b> | Gammaproteobacteria | <i>Vibrio cholerae</i> MJ-1236                             | <a href="#">593588.VCD_002942</a>                 | IVb      |
| <b>Proteobacteria</b> | Gammaproteobacteria | <i>Vibrio cholerae</i> O1 biovar El Tor str. N16961        | <a href="#">243277.VC1403</a>                     | IVb      |
| <b>Proteobacteria</b> | Gammaproteobacteria | <i>Vibrio cholerae</i> O395                                | <a href="#">A5F8C4_VIBC3</a>                      | IVb      |

Cytoplasmic receptors that contain two consecutive MA domains.
